# Supplementary material for: Virtual Electrode Recording Tool for EXtracellular potentials (VERTEX): comparing multi-electrode recordings from simulated and biological mammalian cortical tissue
Source: PubMed Central journal article supplement (PMC4481302; doi:10.1007/s00429-014-0793-x), 2014-05-27
Supplement: 429_2014_793_MOESM1_ESM.pdf [file 429_2014_793_MOESM1_ESM.pdf]

## **ELECTRONIC SUPPLEMENTARY MATERIAL**

### **Virtual Electrode Recording Tool for EXtracellular potentials (VERTEX): Comparing multi-electrode recordings from simulated and biological mammalian cortical tissue**

#### **Brain Structure and Function**

Richard J Tomsett, Matt Ainsworth, Alexander Thiele, Mehdi Sanayei, Xing Chen, Alwin Gieselmann, Miles A Whittington, Mark O Cunningham\* and Marcus Kaiser\*

\*Joint senior authors

#### **Correspondence:**

Dr Marcus Kaiser  
School of Computing Science  
Newcastle University  
Claremont Tower,  
Newcastle upon Tyne, NE1 7RU, United Kingdom

Telephone: +44 191 208 8161

Fax: +44 191 208 8232

Email: m.kaiser@ncl.ac.uk

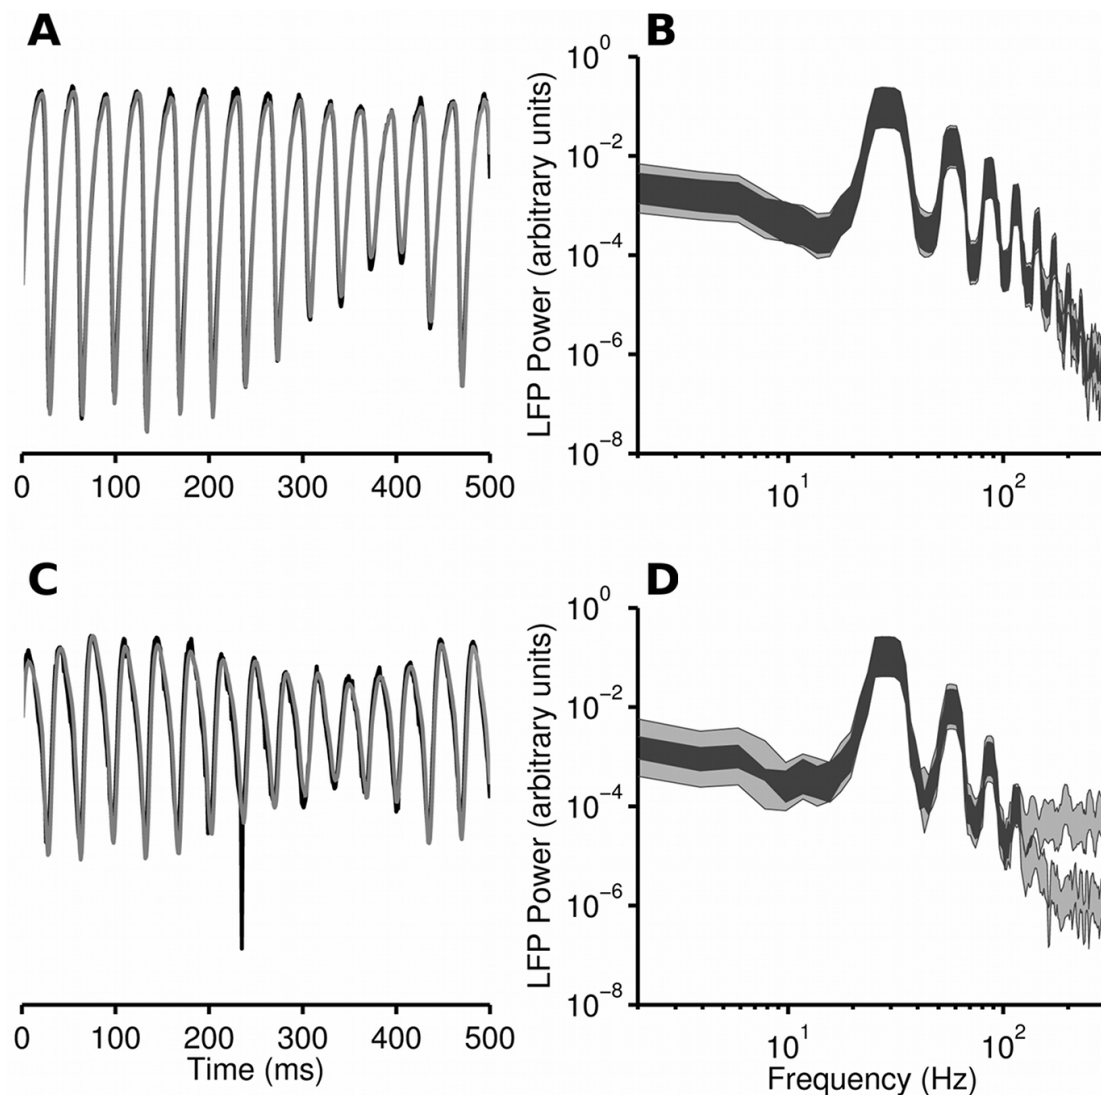

**Fig. ESM1** Comparison of simulated LFPs when using purely passive neurons with imported spike times, and when using the AdEx spiking model in the neocortical slice model (related to Results: Spike Import section). Traces in **a** and **c** have been normalised to zero mean, unit standard deviation so that the shape of the LFP signal can be more easily compared, but are otherwise unfiltered. The adaptive current of the AdEx mechanism introduces an offset in the simulated LFPs, but does not dramatically affect the shape of the signal. **a** Simulated LFPs from electrode 42; AdEx version in black, passive version in grey. **b** Power spectral density overlap of these signals (estimated for 500ms signal), with overlapping parts of the estimated spectrum shown in dark grey and non-overlapping shown in light grey. **c** As **a**, but for electrode 97. Note the small, sharp spike at ~230ms in the AdEx signal. This is a result of the AdEx reset mechanism creating a very short, fast current from a neuron very close to the electrode. **d** As **b**, but for electrode 97. Power spectra diverge above ~100 Hz due to high frequency spike contamination in the AdEx model, but match closely below 100 Hz. We recommend that, while the LFP can be estimated directly when using AdEx spiking networks, results should be checked by using VERTEX's spike import function if a true representation of the synaptic contribution to the LFP is sought at higher frequencies

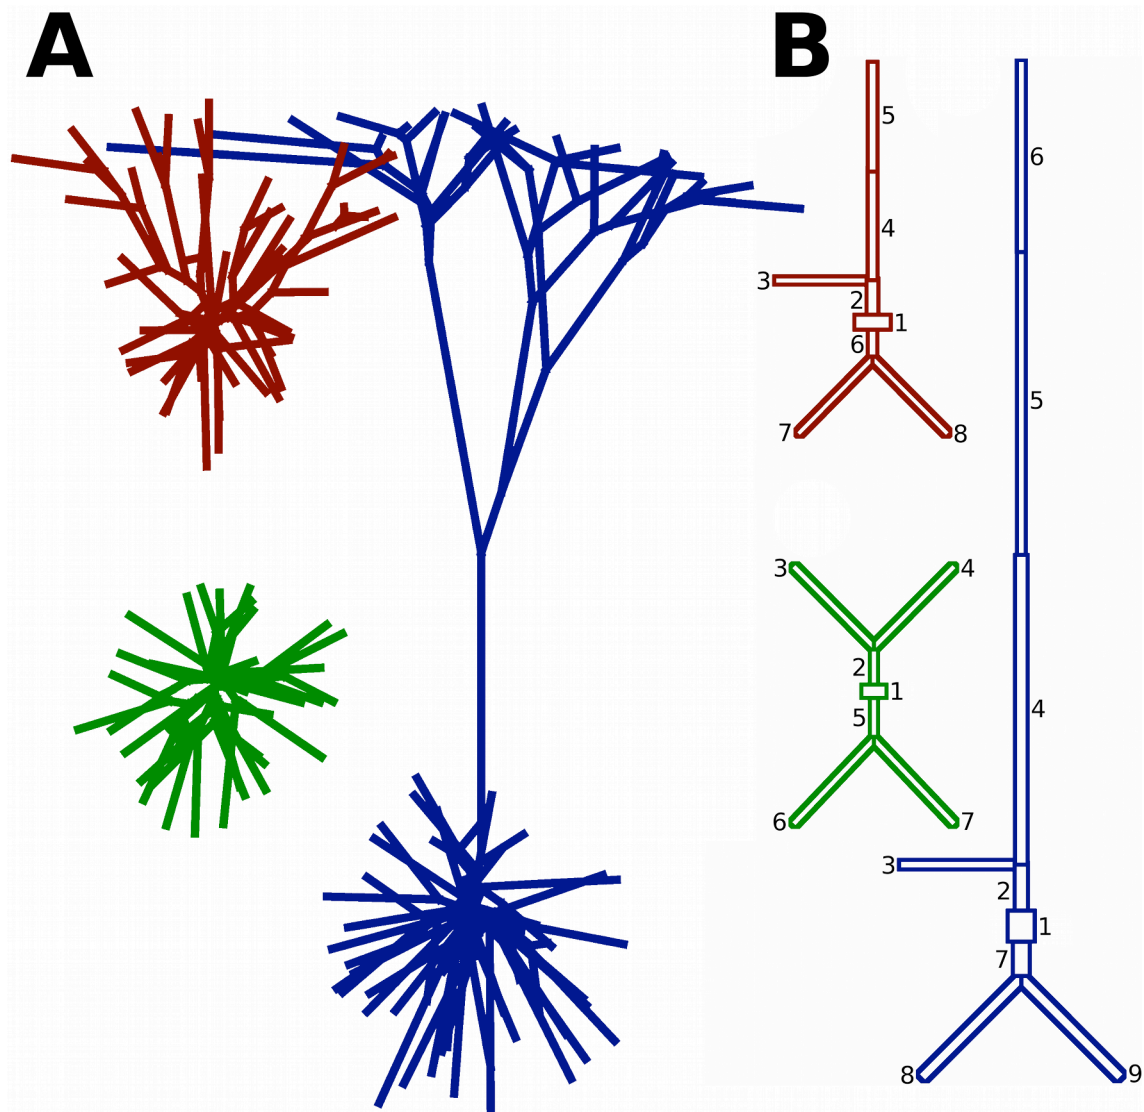

**Fig. ESM2 a** Compartmental structures of morphological cell reconstructions from (Mainen and Sejnowski 1996). The layer 2/3 pyramidal cell, layer 4 spiny stellate cell and layer 5 pyramidal cell are shown in red, green and blue, respectively. **b** Compartmental models reduced from the structures in **a** according to the method in (Bush and Sejnowski, 1993). Compartment numbers correspond to those in Table ESM1

**Table ESM1** Reduced neuron model compartment dimensions, used in all reported simulations

| Compartment number | <b>P2/3, P4</b>          |                            | <b>P5, P6</b>            |                            | <b>SS, B, NB</b>         |                            |
|--------------------|--------------------------|----------------------------|--------------------------|----------------------------|--------------------------|----------------------------|
|                    | Length ( $\mu\text{m}$ ) | Diameter ( $\mu\text{m}$ ) | Length ( $\mu\text{m}$ ) | Diameter ( $\mu\text{m}$ ) | Length ( $\mu\text{m}$ ) | Diameter ( $\mu\text{m}$ ) |
| 1                  | 13                       | 29.80                      | 35                       | 25.00                      | 10                       | 24.00                      |
| 2                  | 48                       | 3.75                       | 65                       | 4.36                       | 56                       | 1.93                       |
| 3                  | 124                      | 1.91                       | 152                      | 2.65                       | 151                      | 1.95                       |
| 4                  | 145                      | 2.81                       | 398                      | 4.10                       | 151                      | 1.95                       |
| 5                  | 137                      | 2.69                       | 402                      | 2.25                       | 56                       | 1.93                       |
| 6                  | 40                       | 2.62                       | 252                      | 2.40                       | 151                      | 1.95                       |
| 7                  | 143                      | 1.69                       | 52                       | 5.94                       | 151                      | 1.95                       |
| 8                  | 143                      | 1.69                       | 186                      | 3.45                       | -                        | -                          |
| 9                  | -                        | -                          | 186                      | 3.45                       | -                        | -                          |

**Table ESM2** Neuron model parameters, used in all reported simulations (simulations of purely passive neurons only have  $C_m$ ,  $R_m$ ,  $R_a$  and  $E_l$  specified)

| Neuron type     | $C_m$ ( $\mu\text{Fcm}^{-2}$ ) | $R_m$ ( $\text{k}\Omega\text{cm}^2$ ) | $R_a$ ( $\Omega\text{cm}$ ) | $E_l$ (mV) | $V_T$ (mV) | $\Delta_T$ (mV) | $\alpha$ (nS) | $\tau_w$ (ms) | $\beta$ (pA) | $v_{reset}$ (mV) |
|-----------------|--------------------------------|---------------------------------------|-----------------------------|------------|------------|-----------------|---------------|---------------|--------------|------------------|
| <b>P2/3, P4</b> | 2.96                           | 6.76                                  | 150                         | -70        | -50        | 2.0             | 2.60          | 65            | 220          | -60              |
| <b>SS4</b>      | 2.95                           | 5.12                                  | 150                         | -70        | -50        | 2.2             | 0.35          | 150           | 40           | -70              |
| <b>P5</b>       | 2.95                           | 6.78                                  | 150                         | -70        | -52        | 2.0             | 10.00         | 75            | 345          | -62              |
| <b>P6</b>       | 2.95                           | 6.78                                  | 150                         | -70        | -50        | 2.0             | 0.35          | 160           | 60           | -60              |
| <b>B</b>        | 2.93                           | 5.12                                  | 150                         | -70        | -50        | 2.0             | 0.04          | 10            | 40           | -65              |
| <b>NB</b>       | 2.93                           | 5.12                                  | 150                         | -70        | -55        | 2.2             | 0.04          | 75            | 75           | -62              |

**Table ESM3** Model composition. Neuron population sizes are given as percentage of total model size. The maximum number of synapses received by a postsynaptic neuron is specified per-layer for pyramidal neurons, whose apical dendrites span several layers. The proportions of these synapses made by each presynaptic neuron group are given in percentages of these maximal synapse numbers. Neurons in the slice model receive fewer than the maximum number of possible synapses because of the effects of slice cutting (see below). Adapted from (Binzegger et al., 2004), with long-range connections removed

|                      |                  | Presynaptic neurons |                  |      |      |       |         |           |     |      |      |          |         |      |      |        |         |      |      |
|----------------------|------------------|---------------------|------------------|------|------|-------|---------|-----------|-----|------|------|----------|---------|------|------|--------|---------|------|------|
|                      |                  | percent of cells    | max no. synapses | P2/3 | B2/3 | nB2/3 | ss4(L4) | ss4(L2/3) | p4  | b4   | nb4  | p5(L2/3) | p5(L56) | b5   | nb5  | p6(L4) | p6(L56) | b6   |      |
| Postsynaptic neurons | <b>P2/3</b>      | L2/3                | 26.3             | 5773 | 60.1 | 9.2   | 4.9     | 0.6       | 6.9 | 7.8  | 0.8  | -        | 7.5     | -    | -    | -      | 2.4     | -    | -    |
|                      |                  | L1                  |                  | 87   | 95.1 | 1.6   | -       | -         | 0.3 | 1.5  | 0.1  | -        | 1.1     | -    | -    | -      | -       | -    | -    |
|                      | <b>B2/3</b>      | 3.1                 | 3702             | 53.7 | 11.0 | 12.3  | 0.5     | 6.1       | 6.8 | 0.9  | -    | 6.6      | -       | -    | -    | 2.1    | -       | -    |      |
|                      | <b>NB2/3</b>     | 4.2                 | 3144             | 57.8 | 12.6 | 4.6   | 0.5     | 6.6       | 7.5 | 0.9  | -    | 7.2      | -       | -    | -    | 2.2    | -       | -    |      |
|                      | <b>SS4(L4)</b>   | 9.3                 | 4113             | 3.8  | 0.3  | -     | 16.7    | 5.2       | 5.8 | 12.9 | 8.1  | 1.1      | 0.1     | -    | -    | 46.1   | -       | -    |      |
|                      | <b>SS4(L2/3)</b> | 9.3                 | 3610             | 7.7  | 0.6  | -     | 15.6    | 5.3       | 5.9 | 12.8 | 7.6  | 1.5      | 0.1     | -    | -    | 43.0   | -       | -    |      |
|                      | <b>P4</b>        | L4                  | 9.3              | 3619 | 6.0  | 0.3   | -       | 16.0      | 5.0 | 5.8  | 12.9 | 8.3      | 1.6     | 0.1  | 0.1  | -      | 43.7    | 0.1  | -    |
|                      |                  | L2/3                |                  | 867  | 63.0 | 5.1   | 5.1     | 0.6       | 7.2 | 8.1  | 0.6  | -        | 7.8     | -    | -    | -      | 2.5     | -    | -    |
|                      |                  | L1                  |                  | 53   | 6.0  | 0.3   | -       | 16.0      | 5.0 | 5.8  | 12.9 | 8.3      | 1.6     | 0.1  | 0.1  | -      | 43.7    | 0.1  | -    |
|                      | <b>B4</b>        | 5.5                 | 2359             | 8.0  | 0.7  | -     | 15.1    | 5.2       | 5.8 | 14.8 | 7.3  | 1.5      | 0.1     | -    | -    | 41.6   | -       | -    |      |
|                      | <b>NB4</b>       | 1.5                 | 2636             | 3.7  | 0.3  | -     | 16.3    | 5.1       | 5.6 | 14.8 | 7.9  | 1.1      | 0.1     | -    | -    | 45.0   | -       | -    |      |
|                      | <b>P5(L2/3)</b>  | L5                  | 4.9              | 3971 | 49.9 | 2.0   | -       | 3.6       | 2.2 | 8.2  | 1.0  | -        | 12.7    | 1.1  | 2.1  | 12.5   | 2.5     | 2.2  | -    |
|                      |                  | L4                  |                  | 198  | 4.0  | 0.1   | -       | 17.4      | 5.4 | 6.0  | 9.5  | 8.4      | 1.1     | 0.1  | -    | -      | 48.0    | -    | -    |
|                      |                  | L2/3                |                  | 413  | 62.9 | 5.1   | 5.1     | 0.6       | 7.2 | 8.1  | 0.6  | -        | 7.8     | -    | -    | -      | 2.4     | -    | -    |
|                      |                  | L1                  |                  | 12   | 97.7 | 1.7   | -       | -         | 0.3 | 1.5  | 0.1  | -        | 1.1     | -    | -    | -      | -       | -    | -    |
|                      | <b>P5(L56)</b>   | L5                  | 1.3              | 4588 | 49.3 | 1.8   | -       | 3.6       | 2.2 | 8.1  | 0.9  | -        | 12.5    | 1.3  | 2.0  | 13.0   | 2.5     | 2.8  | -    |
|                      |                  | L4                  |                  | 666  | 4.0  | 0.1   | -       | 17.4      | 5.4 | 6.0  | 9.5  | 8.4      | 1.1     | 0.1  | -    | -      | 48.0    | -    | -    |
|                      |                  | L2/3                |                  | 1368 | 63.0 | 5.1   | 5.1     | 0.6       | 7.2 | 8.1  | 0.6  | -        | 7.8     | -    | -    | -      | 2.5     | -    | -    |
|                      |                  | L1                  |                  | 375  | 95.6 | 1.7   | -       | -         | 0.3 | 1.5  | 0.1  | -        | 1.1     | -    | -    | -      | -       | -    | -    |
|                      | <b>B5</b>        | 0.6                 | 2744             | 49.5 | 2.5  | -     | 3.6     | 2.2       | 8.1 | 1.2  | -    | 12.6     | 1.1     | 2.3  | 12.3 | 2.5    | 2.2     | -    |      |
|                      | <b>NB5</b>       | 0.8                 | 2744             | 49.5 | 2.5  | -     | 3.6     | 2.2       | 8.1 | 1.2  | -    | 12.6     | 1.1     | 2.3  | 12.3 | 2.5    | 2.2     | -    |      |
|                      | <b>P6(L4)</b>    | L6                  | 13.8             | 1326 | 6.1  | 0.3   | -       | 1.8       | 2.1 | 3.1  | 0.2  | -        | 0.2     | 12.0 | 0.9  | -      | 2.9     | 32.4 | 38.1 |
|                      |                  | L5                  |                  | 979  | 51.0 | 0.9   | -       | 3.7       | 2.3 | 8.4  | 0.6  | -        | 13.0    | 1.1  | 1.6  | 12.7   | 2.5     | 2.3  | -    |
|                      |                  | L4                  |                  | 1344 | 4.0  | 0.1   | -       | 17.4      | 5.4 | 6.0  | 9.5  | 8.4      | 1.1     | 0.1  | -    | -      | 48.0    | -    | -    |
|                      |                  | L2/3                |                  | 121  | 62.9 | 5.1   | 5.1     | 0.6       | 7.2 | 8.1  | 0.6  | -        | 7.8     | -    | -    | -      | 2.4     | -    | -    |
|                      | <b>P6(L56)</b>   | L6                  | 4.6              | 2264 | 4.0  | 0.1   | -       | 17.4      | 5.4 | 6.0  | 9.5  | 8.4      | 1.1     | 0.1  | -    | -      | 48.0    | -    | -    |
|                      |                  | L5                  |                  | 236  | 51.0 | 0.9   | -       | 3.7       | 2.3 | 8.4  | 0.6  | -        | 13.0    | 1.1  | 1.6  | 12.7   | 2.5     | 2.3  | -    |
|                      |                  | L4                  |                  | 171  | 4.0  | 0.1   | -       | 17.4      | 5.4 | 6.0  | 9.4  | 8.4      | 1.1     | 0.1  | -    | -      | 47.8    | -    | -    |
|                      |                  | L2/3                |                  | 286  | 63.1 | 5.1   | 5.1     | 0.6       | 7.2 | 8.1  | 0.6  | -        | 7.8     | -    | -    | -      | 2.5     | -    | -    |
|                      |                  | L1                  |                  | 4    | 97.7 | 1.7   | -       | -         | 0.3 | 1.5  | 0.1  | -        | 1.1     | -    | -    | -      | -       | -    | -    |
| <b>B6</b>            | 2.0              | 1310                | 6.1              | 0.3  | -    | 1.8   | 2.1     | 3.1       | 0.2 | -    | 0.2  | 12.0     | 0.9     | -    | 2.9  | 32.4   | 38.1    |      |      |

**Table ESM4** Axonal arborisation radii for each neuron group in each layer (mm), adapted from Figure 8 of the supporting information of (Izhikevich and Edelman, 2008). Where no radius was given for a neuron group in a layer in which connections are specified in Table ESM3, we set the radius to 0.05 mm

|                  | L1   | L2/3 | L4   | L5   | L6   |
|------------------|------|------|------|------|------|
| <b>P2/3</b>      | 0.55 | 1.12 | 0.15 | 1.00 | 0.15 |
| <b>B2/3</b>      | 0.05 | 0.50 | 0.15 | 0.15 | 0.05 |
| <b>NB2/3</b>     | 0.20 | 0.20 | 0.20 | 0.20 | 0.20 |
| <b>SS4(L4)</b>   | 0.05 | 0.30 | 1.12 | 0.40 | 0.15 |
| <b>SS4(L2/3)</b> | 0.15 | 0.40 | 0.50 | 0.15 | 0.15 |
| <b>P4</b>        | 0.15 | 1.12 | 0.15 | 0.55 | 0.15 |
| <b>B4</b>        | 0.05 | 0.05 | 0.50 | 0.05 | 0.05 |
| <b>NB4</b>       | 0.20 | 0.20 | 0.20 | 0.20 | 0.20 |
| <b>P5(L2/3)</b>  | 0.15 | 0.40 | 0.30 | 0.50 | 0.25 |
| <b>P5(L5/6)</b>  | 0.05 | 0.05 | 0.15 | 0.50 | 1.00 |
| <b>B5</b>        | 0.05 | 0.05 | 0.05 | 0.5  | 0.05 |
| <b>NB5</b>       | 0.20 | 0.20 | 0.20 | 0.20 | 0.20 |
| <b>P6(L4)</b>    | 0.05 | 0.15 | 1.00 | 0.15 | 0.15 |
| <b>P6(L5/6)</b>  | 0.05 | 0.05 | 0.15 | 0.50 | 1.00 |
| <b>B6</b>        | 0.05 | 0.05 | 0.05 | 0.10 | 0.50 |

**Table ESM5** Synaptic weights (nS)

|                      |                  | Presynaptic neurons |       |       |         |           |       |       |       |          |          |       |       |        |          |       |
|----------------------|------------------|---------------------|-------|-------|---------|-----------|-------|-------|-------|----------|----------|-------|-------|--------|----------|-------|
|                      |                  | P2/3                | B2/3  | NB2/3 | SS4(L4) | SS4(L2/3) | P4    | B4    | NB4   | P5(L2/3) | P5(L5/6) | B5    | NB5   | P6(L4) | P6(L5/6) | B6    |
| Postsynaptic neurons | <b>P2/3</b>      | 0.020               | 0.126 | 0.001 | 0.356   | 0.036     | 0.073 | 1.080 | -     | 0.004    | -        | -     | -     | 0.047  | -        | -     |
|                      | <b>B2/3</b>      | 0.560               | 0.026 | 0.001 | 0.701   | 0.078     | 0.161 | 0.228 | -     | 0.074    | -        | -     | -     | 0.159  | -        | -     |
|                      | <b>NB2/3</b>     | 0.408               | 0.069 | 0.014 | 0.872   | 0.085     | 0.173 | 0.581 | -     | 0.159    | -        | -     | -     | 0.178  | -        | -     |
|                      | <b>SS4(L4)</b>   | 0.001               | 0.043 | -     | 0.067   | 0.092     | 0.061 | 0.010 | 0.003 | 0.069    | 0.069    | -     | -     | 0.004  | -        | -     |
|                      | <b>SS4(L2/3)</b> | 0.001               | 0.043 | -     | 0.067   | 0.092     | 0.061 | 0.011 | 0.003 | 0.069    | 0.069    | -     | -     | 0.004  | -        | -     |
|                      | <b>P4</b>        | 0.001               | 0.043 | 0.008 | 0.067   | 0.092     | 0.061 | 0.014 | 0.001 | 0.069    | 0.069    | -     | -     | 0.004  | 0.004    | -     |
|                      | <b>B4</b>        | 0.101               | 0.098 | -     | 0.627   | 0.627     | 0.627 | 0.025 | 0.003 | 0.841    | 0.841    | -     | -     | 0.062  | 0.062    | -     |
|                      | <b>NB4</b>       | 0.139               | 0.244 | -     | 0.318   | 0.318     | 0.318 | 0.068 | 0.013 | 1.058    | 1.058    | -     | -     | 0.052  | -        | -     |
|                      | <b>P5(L2/3)</b>  | 0.037               | 0.188 | 0.004 | 0.091   | 0.082     | 0.050 | 0.341 | 0.005 | 0.079    | 0.471    | 0.459 | 0.003 | 0.032  | 0.093    | -     |
|                      | <b>P5(L5/6)</b>  | 0.037               | 0.188 | 0.004 | 0.091   | 0.082     | 0.050 | 0.289 | 0.005 | 0.062    | 0.335    | 0.416 | 0.003 | 0.032  | 0.093    | -     |
|                      | <b>B5</b>        | 0.083               | 0.098 | -     | 0.274   | 0.273     | 0.151 | 0.191 | -     | 0.910    | 3.966    | 0.166 | 0.003 | 0.342  | 0.207    | -     |
|                      | <b>NB5</b>       | 0.064               | 0.244 | -     | 0.331   | 0.422     | 0.196 | 0.521 | -     | 0.603    | 2.596    | 0.166 | 0.014 | 0.359  | 0.657    | -     |
|                      | <b>P6(L4)</b>    | 0.003               | 1.045 | 0.015 | 0.137   | 0.145     | 0.095 | 0.226 | 0.001 | 0.084    | 0.055    | 0.293 | 0.004 | 0.064  | 0.062    | 0.075 |
|                      | <b>P6(L5/6)</b>  | 0.003               | 1.045 | 0.015 | 0.137   | 0.145     | 0.095 | 0.978 | 0.016 | 0.201    | 0.055    | 0.293 | 0.004 | 0.064  | 0.062    | 0.048 |
|                      | <b>B6</b>        | 0.123               | 0.140 | -     | 0.274   | 0.273     | 0.151 | 0.193 | -     | 0.091    | 0.091    | 0.021 | -     | 1.105  | 0.768    | 0.015 |

**Table ESM6** Synaptic parameters (postsynaptic), from (Traub et al., 2005b)

|              | $E_{AMPA}$ (mV) | $E_{GABA}$ (mV) | $t_{AMPA}$ (ms) | $t_{GABA}$ (ms) |
|--------------|-----------------|-----------------|-----------------|-----------------|
| <b>P, SS</b> | 0               | -75             | 2.0             | 6.0             |
| <b>B, NB</b> | 0               | -75             | 0.8             | 3.0             |

**Table ESM7** Compartment IDs in each postsynaptic group that presynaptic neurons connect onto (compartment numbers illustrated in Fig. ESM2). Based on (Traub et al., 2005b)

| Postsynaptic neurons | Presynaptic neurons |         |         |         |         |         |
|----------------------|---------------------|---------|---------|---------|---------|---------|
|                      | P2/3, P4            | SS      | P5      | P6      | B       | NB      |
| P2/3, P4             | 3,6,7,8             | 6-8     | 4,5     | 4       | 1,2,6   | 3-5,7,8 |
| SS4                  | 3,4,6,7             | 3,4,6,7 | 3,4,6,7 | 3,4,6,7 | 1,2,5   | 3,4,6,7 |
| P5                   | 2-9                 | 2-5     | 2-5,7-9 | 2-5,7-9 | 1,2,7   | 3-5,7,8 |
| P6                   | 2-9                 | 2,4,5   | 2-9     | 2-9     | 1,2,7   | 3-5,7,8 |
| B                    | 3,4,6,7             | 3,4,6,7 | 3,4,6,7 | 3,4,6,7 | 3,4,6,7 | 3,4,6,7 |
| NB                   | 3,4,6,7             | 3,4,6,7 | 3,4,6,7 | 3,4,6,7 | 3,4,6,7 | 3,4,6,7 |

**Table ESM8** Neocortical slice model layer boundaries. Brain surface is at 2600 microns, white matter boundary at 0 microns

| Layer | Upper boundary ( $\mu\text{m}$ ) |
|-------|----------------------------------|
| 1     | 2600                             |
| 2/3   | 2362                             |
| 4     | 1835                             |
| 5     | 1122                             |
| 6     | 832                              |

**Table ESM9** Random current input parameters

|       | Mean current<br>(pA) | Standard deviation<br>(pA) | Noise correlation time<br>constant (ms) |
|-------|----------------------|----------------------------|-----------------------------------------|
| P2/3  | 360                  | 110                        | 2.0                                     |
| B2/3  | 200                  | 60                         | 0.8                                     |
| NB2/3 | 160                  | 40                         | 0.8                                     |
| SS4   | 205                  | 50                         | 2.0                                     |
| P4    | 250                  | 70                         | 2.0                                     |
| B4    | 200                  | 60                         | 0.8                                     |
| NB4   | 160                  | 40                         | 0.8                                     |
| P5    | 860                  | 260                        | 2.0                                     |
| B5    | 200                  | 60                         | 0.8                                     |
| NB5   | 160                  | 40                         | 0.8                                     |
| P6    | 660                  | 170                        | 2.0                                     |
| B6    | 200                  | 60                         | 0.8                                     |

**Table ESM10** List of the extra cell models downloaded from NeuroMorpho.org (Ascoli et al., 2007) used to investigate LFP range and magnitude in Fig. 1 and Fig. 2. Further experimental details are given in the Supplementary Methods, below

| Type | NeuroMorpho.Org ID | Species/Region         | Original publication     |
|------|--------------------|------------------------|--------------------------|
| P2/3 | NMO_00850          | Cat visual cortex      | Kisvárdy and Eysel, 1992 |
| P2/3 | NMO_00851          | Cat visual cortex      | Kisvárdy and Eysel, 1992 |
| P2/3 | NMO_00853          | Cat visual cortex      | Kisvárdy and Eysel, 1992 |
| P2/3 | NMO_00854          | Cat visual cortex      | Kisvárdy and Eysel, 1992 |
| P2/3 | NMO_00859          | Cat visual cortex      | Kisvárdy and Eysel, 1992 |
| P2/3 | NMO_00856          | Cat visual cortex      | Kisvárdy and Eysel, 1992 |
| P2/3 | NMO_00857          | Cat visual cortex      | Kisvárdy and Eysel, 1992 |
| P2/3 | NMO_00935          | Cat visual cortex      | Hirsch et al., 2002      |
| P2/3 | NMO_05813          | Cat suprasylvian gyrus | Volgushev et al., 2006   |
| P2/3 | NMO_05811          | Cat suprasylvian gyrus | Volgushev et al., 2006   |
| P5   | NMO_00880          | Cat temporal sulcus    | Contreras et al., 1997   |

**Table ESM11** Firing rates in the model under the four conditions illustrated in Fig. 8: model as described, exhibiting gamma oscillation; model with P2/3 -> B2/3 connections at 1% baseline strength; model with B2/3 -> P2/3 connections at 1% baseline strength; model with increased input current to B2/3 neurons (150% mean and standard deviation)

|           | Baseline | 1% P2/3 -> B2/3<br>weight | 1% B2/3 -> P2/3<br>weight | 150% input to B2/3 |
|-----------|----------|---------------------------|---------------------------|--------------------|
| P2/3      | 3.6      | 7.0                       | 9.4                       | 0.0                |
| B2/3      | 24.8     | 1.1                       | 60.5                      | 66.8               |
| NB2/3     | 4.2      | 8.4                       | 4.0                       | 0.0                |
| SS4(L4)   | 1.3      | 1.4                       | 1.0                       | 1.0                |
| SS4(L2/3) | 1.2      | 1.4                       | 0.7                       | 0.6                |
| P4        | 1.6      | 1.9                       | 1.0                       | 0.9                |
| B4        | 5.6      | 9.2                       | 3.4                       | 1.2                |
| NB4       | 2.1      | 2.6                       | 1.4                       | 0.6                |
| P5(L2/3)  | 3.9      | 4.3                       | 2.6                       | 2.0                |
| P5(L5/6)  | 3.6      | 4.3                       | 2.1                       | 1.4                |
| B5        | 16.8     | 23.4                      | 4.0                       | 0.3                |
| NB5       | 3.3      | 4.8                       | 0.1                       | 0.0                |
| P6(L4)    | 1.5      | 2.3                       | 0.7                       | 0.5                |
| P6(L5/6)  | 1.4      | 1.9                       | 0.7                       | 0.6                |
| B6        | 7.1      | 9.3                       | 5.7                       | 4.5                |



## SUPPLEMENTARY METHODS

### Reduced neuron models

During our investigations with the reduced cell models, we found some inconsistencies when comparing their dynamics with the original cell reconstructions when using the reduced compartment dimensions given in (Bush and Sejnowski, 1993). We therefore recalculated the compartment lengths and diameters from the three cell types specified in (Mainen and Sejnowski, 1996) using the method specified in (Bush and Sejnowski, 1993). For these calculations, we used a version of the NEURON code originally written by Alain Destexhe to reduce a compartmental model to 3 compartments (Destexhe et al., 1998), modified by Michael Hines to work for any number of compartments. This code implements the method described in (Bush and Sejnowski, 1993). Michael Hines' version of this code is available on the NEURON forum at <http://www.neuron.yale.edu/phpbb/viewtopic.php?f=13&t=589>. The recalculated cell dimensions are given in Table ESM1. We used our recalculated dimensions both for the LFP simulation comparison between the cell reconstructions and reduced cell models and for the neocortical slice model.

### Comparison of LFPs from reduced & full neuron morphologies

Fig. 1 and Fig. 2 show comparisons between LFPs calculated using populations containing reduced and full neuron models, and include further comparisons with extra (full-scale) neurons to place the results in the context of general biological variability (experiments described in the main text). These extra neurons were downloaded from NeuroMorpho.Org (Ascoli et al., 2007) and are listed in Table ESM10, above. Prior to being simulated in LFPy, we first removed all axonal compartments and rotated the neurons so that their apical dendrites were approximately parallel with the  $z$ -axis.

### Connectivity

The connectivity model for the neocortical slice model (implemented in VERTEX) is described in the main text; here we give details of how neurons spanning multiple layers are connected. Pyramidal neuron dendrites span several layers above their soma layer, and connectivity statistics are provided per layer for pyramidal cells in (Binzegger et al., 2004) – see Table ESM3. As all neurons within a population are the same size, but have different soma positions, each neuron's compartments will cross the model's layer boundaries at different points. For simplicity, we ignore this variability for the purposes of connecting up the model, defining the layers in which a compartment resides based on its position when its neuron's soma is positioned in the centre of its layer. If several compartments could be chosen, then the compartment on which the synapse is made is chosen randomly, with each possible compartment having a probability of being selected equal to the membrane area of the compartment in the layer divided by the neuron's total membrane area in the layer. The chosen compartment must also be allowed according to Table ESM7. For our simulations, we allowed multiple synapses between a single pre- and postsynaptic neuron pair (targets randomly chosen with replacement), but did not allow autapses. These options can be configured in the simulation parameters.

### Neuron and synapse dynamics

For the dynamics simulation of the neocortical slice model, we chose the 2 variable adaptive exponential (AdEx) model (Brette and Gerstner, 2005). The AdEx model can reproduce most of the dynamical features exhibited by cortical neurons (Naud et al., 2008), all its parameters have a direct biological correlate (Gerstner and Brette, 2009) making the model easy to interpret and modify in light of new experimental data, its sub-threshold behaviour is realistic (Badel et al., 2008), and its bifurcation structure is well characterised and is the same as the commonly used Izhikevich model (Naud et al., 2008; Touboul and Brette, 2008). It can be extended to include passive dendrite compartments (Clopath et al., 2007; Gerstner and Brette, 2009) required for LFP simulation, which we did by incorporating the AdEx dynamics into the somatic compartment of the passive cell model reductions described above. A modification of the AdEx model was also used recently in another study of gamma oscillations (Economo and White, 2012).

Each neuron is modelled as a passive cable structure of cylindrical compartments, with the AdEx spiking mechanism at the soma compartment. Passive parameters are given above. The somatic membrane potential  $v_s$  evolves according to equation ESM1:

$$C_s \frac{dv_s}{dt} = -g_{leak,s} (v_s - E_{leak}) - \sum_j g_{sj} (v_s - v_j) + g_{leak,s} \Delta_t \exp\left(\frac{v_s - V_t}{\Delta_t}\right) - w + I_s, \quad (\text{ESM1})$$

$$\tau_w \frac{dw}{dt} = \alpha (v_s - E_{leak}) - w,$$

if  $v_s \geq v_{cutoff}$ :

$$\begin{aligned} v_s &\leftarrow v_{reset}, \\ w &\leftarrow w + \beta, \end{aligned}$$

where  $C_s$  is the soma membrane capacitance,  $g_{leak,s}$  is the soma leak conductance (= reciprocal of soma membrane resistance),  $E_{leak}$  is the leak reversal potential,  $g_{sj}$  are the conductances between the soma and its  $j^{\text{th}}$  connected compartments,  $v_j$  is the membrane potential of the  $j^{\text{th}}$  connected compartment,  $\Delta_t$  is a constant defining the spike steepness,  $V_t$  is the instantaneous threshold potential,  $w$  is a current representing the combined slow ionic currents,  $I_s$  is the total current input at the soma (from synaptic and externally applied currents),  $\tau_w$  is the time constant of the slow current  $w$ ,  $\alpha$  is the scale factor of the slow current,  $v_{cutoff}$  is the potential at which a spike is said to have been fired,  $v_{reset}$  is the membrane potential to which  $v_s$  returns after a spike, and  $\beta$  is the instantaneous change in the value of the slow current  $w$  after a spike (Brette and Gerstner, 2005). All dendrites are passive:

$$C_k \frac{dv_k}{dt} = -g_{leak,k} (v_k - E_{leak}) - \sum_j g_{kj} (v_k - v_j) + I_k, \quad (\text{ESM2})$$

where the symbols are as before, for dendritic compartment  $k$  rather than soma  $s$ .

We adjusted the parameters for each neuron type to produce similar spiking patterns to the model neurons described in (Traub et al., 2005b). Each cell type's passive parameters were defined by its morphology and the electrotonic parameters given in Table ESM2; therefore, the parameters adjusted to fit the spiking responses of the Traub neurons were the spike slope factor  $\Delta_t$ , threshold  $V_t$ , adaptation time constant  $\tau_w$ , adaptation coupling parameter  $\alpha$ , reset value  $v_{reset}$ , and instantaneous adaptation current increase  $\beta$ . We employed a qualitative approach to parameter adjustment, guided by the analysis of the AdEx model in (Naud 2008). According to the classifications in (Naud 2008), B, SS and P6 cells have a sharp reset, while NB, P2/3, P4 and P5 cells have a broad reset. B cells are non-adapting; SS and P6 cells are adapting; P2/3, P4, P5 and NB cells show an initial burst. These properties were chosen based on the membrane potential traces reported in Appendix A of (Traub et al., 2005b).

The model includes AMPA and GABA<sub>A</sub> synapses, each modelled as single exponential, conductance-based synapses. When a neuron fires a spike, the synaptic conductances ( $g_{AMPA}$  for excitatory presynaptic neurons,  $g_{GABA}$  for inhibitory presynaptic neurons) at the contacted target compartments  $k$  (specified in the connectivity matrix) are increased by the synaptic weight (specified in the weights matrix) after the relevant axonal delay time, then decay exponentially:

$$\begin{aligned} \frac{dg_{AMPA,k}}{dt} &= -\frac{g_{AMPA,k}}{\tau_{AMPA}}, \\ \frac{dg_{GABA,k}}{dt} &= -\frac{g_{GABA,k}}{\tau_{GABA}}, \end{aligned} \quad (\text{ESM3})$$

where  $\tau_{AMPA}$  and  $\tau_{GABA}$  are the AMPA and GABA<sub>A</sub> synaptic decay constants, respectively (specified in Table ESM6). As we assume that the conductances of individual synapses sum linearly in each compartment, we only need one variable per type of synaptic conductance per compartment, rather than keeping track of all synapses individually. The total synaptic current  $I_k$  at compartment  $k$  at time  $t$  is then given by

$$I_k(t) = g_{AMPA,k} (v_k(t) - E_{AMPA}) + g_{GABA,k} (v_k(t) - E_{GABA}), \quad (\text{ESM4})$$

where  $E_{AMPA}$  and  $E_{GABA}$  are the reversal potentials for AMPA and GABA<sub>A</sub>, respectively. Synaptic weights (Table ESM5) were chosen based on those reported in (Traub et al., 2005b), scaling the weights according to the number of synapses between groups in our model compared with the Traub model. Our neuron populations did not match theirs exactly, with the following differences (in addition to different numbers of neurons and

synapses): our model includes interneurons in every layer, while the Traub model has only “superficial” and “deep” interneurons (with the deep interneurons providing inhibition to layer 4); the Traub model only has spiny stellate cells in layer 4 (no pyramidal or interneurons); the Traub model contains fast rhythmic bursting pyramidal cells in layer 2/3 and intrinsically bursting pyramidal cells in layer 5 – our model contains no bursting neurons; our model contains synapses between some neuron groups that are not present in the Traub model. We therefore had to make several arbitrary decisions when setting some synapse weights between groups.

### Model input

We stimulate our model to mimic the bath application of kainate. This stimulates the pyramidal cell axonal plexus, providing the neurons with excitatory drive. We simulate this by applying independent random input currents  $I_{Ki}$  to each neuron  $i$ , modelled as Ornstein-Uhlenbeck processes similar to (Arsiero et al., 2007) using Gillespie's exact discretisation method:

$$I_{Ki}(t + \delta t) = I_{Ki}(t) + \left(1 - \exp\left(\frac{-\delta t}{\tau_K}\right)\right) \times (m_{Ki} - I_{Ki}(t)) + \sqrt{1 - \exp\left(-2\frac{\delta t}{\tau_K}\right)} \times S_{Ki} \times N_{Ki}(0,1), \quad (\text{ESM5})$$

(Gillespie, 1996), where  $\delta t$  is the length of the time step,  $\tau_k$  is the noise correlation time constant,  $m_{Ki}$  is the mean current value,  $S_{Ki}$  is the standard deviation and  $N_{Ki}(0,1)$  is a normally distributed random number. The random current is distributed across the neuron's compartments proportionally to the compartment membrane areas. Any currents falling below zero are reset to zero for that time step, so that the input current is always either positive or zero.

LFPs are calculated by summing the membrane currents of each compartment, weighted by distance from the electrode tips (described in the main text). The membrane current  $I_{mem,k}$  of compartment  $k$  is just the negative of the axial current  $I_{ax,k}$  entering the compartment (Johnston and Wu, 1995):

$$I_{mem,k} = \sum_j g_{kj} (v_k - v_j) = -I_{ax,k}. \quad (\text{ESM6})$$

### Model implementation

The neocortical slice model was implemented in our VERTEX simulation tool. VERTEX is written in Matlab, using the Matlab Parallel Computing Toolbox for parallelisation, though it can also be run serially. It is designed to be easy to use: neuron groups, connectivity patterns, model size/layers and simulation settings are defined in Matlab structures, requiring minimal programming ability to specify models of different cortical areas, explore the parameter space, or apply different stimuli.

First, the model is initialised by distributing neurons across parallel processes, positioning the neurons, setting up the connectivity matrix, and calculating axonal delays. Next, the electrode locations are specified and distances between each electrode and each compartment are calculated, using either the point distance for somas, or the line source distance for dendrites. Pre-calculating the constant values used in the field potential calculations minimises the impact of calculating the LFP during the simulation.

We used the methods outlined in (Morrison et al., 2005) for parallel simulation. These minimise communication overhead by storing synapse information (delays, postsynaptic neuron IDs and compartment IDs) on the postsynaptic side, so only spiking presynaptic IDs and timestamps need to be exchanged between processes. Spikes do not need to be delivered every time step: assuming the minimum synaptic delay is  $d_{\min} \cdot h$  (where  $h$  is the step size), spikes can be buffered on the pre-synaptic side and exchanged every  $d_{\min}$  time steps. Processes communicate using the complete pairwise exchange algorithm (Tam & Wang, 2000; Morrison et al., 2005).

The simulation made use of vectorised data structures and algorithms in order to keep run-times reasonable (Brette and Goodman, 2011). The benefits of vectorisation increase with model size as fewer interpretation overheads are incurred per variable. In addition to the methods described in (Brette and Goodman, 2011), which do not include compartmental neuron models, we vectorise the calculation of the axial currents between compartments.

## SUPPLEMENTARY REFERENCES

- Badel L, Lefort S, Brette R, Petersen CC, Gerstner W, Richardson MJ (2008). Dynamic I-V curves are reliable predictors of naturalistic pyramidal-neuron voltage traces. *J Neurophysiol* 99 (2):656-666
- Clopath C, Jolivet R, Rauch A, Luscher HR, Gerstner W (2007). Predicting neuronal activity with simple models of the threshold type: Adaptive exponential integrate-and-fire model with two compartments. *Neurocomputing* 70:1668-1673
- Contreras D, Destexhe A, and Steriade M (1997). Intracellular and computational characterization of the intracortical inhibitory control of synchronized thalamic inputs *in vivo*. *J Neurophysiol* 78 (1):335-350
- Destexhe A, Neubig M, Ulrich D, Huguenard J (1998). Dendritic low-threshold calcium currents in thalamic relay cells. *J Neurosci* 18 (10):3574-3588
- Economou MN, White JA (2012). Membrane properties and the balance between excitation and inhibition control gamma-frequency oscillations arising from feedback inhibition. *PLOS Comput Biol* 8 (1):e1002354
- Gerstner W, Brette R (2009). Adaptive exponential integrate-and-fire model. *Scholarpedia* 4:8427
- Gillespie DT (1996). Exact numerical simulation of the Ornstein-Uhlenbeck process and its integral. *Phys Rev E* 54 (2):2084-2091
- Hirsch JA, Martinez LM, Alonso JM, Desai K, Pillai C, Pierre C (2002). Synaptic physiology of the flow of information in the cat's visual cortex *in vivo*. *J Physiol* 540 (Pt 1):335-350
- Kisvárdy ZF, Eysel UT (1992). Cellular organization of reciprocal patchy networks in layer III of cat visual cortex (area 17). *Neuroscience* 46 (2):275-286
- Naud R, Marcille N, Clopath C, Gerstner W (2008). Firing patterns in the adaptive exponential integrate-and-fire model. *Biol Cybern* 99:335-347
- Tam ATC, Wang C-L (2000). Efficient scheduling of complete exchange on clusters. In: Chaudry G, Sha E (eds) 13th International Conference on Parallel and Distributed Computing Systems (PDCS 2000), International Society for Computers and Their Applications, Las Vegas, Nevada, pp 111-116
- Touboul J, Brette R (2008). Dynamics and bifurcations of the adaptive exponential integrate-and-fire model. *Biol Cybern* 99:319-334
- Volgushev M, Chauvette S, Mukovski M, Timofeev I (2006). Precise long-range synchronization of activity and silence in neocortical neurons during slow-wave oscillations. *J Neurosci* 26 (21):5665-5672
